# Supplementary material
Source: publisher figshare collection journal article supplement (https://sage.figshare.com/ndownloader/files/23924312)
Supplement: Supplementary file 1 [file 23924312]

## Sheet: Sheet1
gene	ProbeName	upstream 5'-3’	downstream 5'-3'	probe 5'-3'
LOC101928433	p40947_v4	CCGGAAATCGGCTTTGATAT	CATTTGATGCTCCGGTTGCT	CTGGAAAGGAGACCCGCGCACTC
LOC101929536	p908	AGCCCCTTTCTGCACTCTCT	TCCAGGAGCCTTCCCAGTAC	CTCTTCTCTGGGCGCGCTCTCG
SSSCA1-AS1	p2357	GGGCAGTGGAAAAGCAGCTA	ACAGGGCTCTCCACGTAAGC	CTCTTCCGGATGGCACATGCCC
linc00886	p11567	CCTCGGACATTCTGCTTCTG	GGGTAATTTGCCAGGCATTT	TACCTGCAGCACAAGGAAATCCAACAC
loc101927018	p7273	GCTGAAGGAAGGGAAGCTAAA	TCCAGCTTGATGGAAAATGG	AATGCGTTCAAAATCCTCTCCGTCAGT
ARHGAP5-AS1	p4425	CCTTTTCCCTTTTACCCATTG	CCTTTGCAGTACGGTGGTTT	TTCTCCGTATTCTGCTCCTCCTCAGTCCC
loc102606465	p28977	TGAACCACCCTGGACCTACA	CCAGAGCCCACATGAACATT	TCCAAATTGTTGTTCTAGGCAGCCCA
loc283038	p34140_v4	CCTTTTGCCCAATGTTGACA	GAAGCTCCGACCACTCATGT	AATCTCAAAGCTCTCCAGGAAGCAAGGC
linc00640	p4813	CCCAGTCTTTCCAGATGTTCTT	TCCAGGTGTGCAGGGTTTC	CCACTCCTCAACTGCTCCTGGCTC
ND4L	A_33_P3336696	CTCCCTCTTAGCCAATATTGTGC	TAGTCTAGGCCATATGTGTTGGAGA	CTAGTCTTTGCCGCCTGCGAAGCA
CCNG2	A_24_P80532	CAACTTTTTTGGATCTTGCAC	AAGACAAATGTTTAGGTTTCACCT	TTGTCCTGGCTGTCAATATTTTGGA
CCNF	A_24_P193592	TCTGTTATCCTACAAAGCGAAGAAT	GTCCTCTACAGAAAGCCATTTCA	AGGAGGCCCCGAAACCTGACC
CENPA	A_24_P413884	TGTGGACTTCAATTGGCAAG	GGTGAGGAGATAGGCGTCC	TATTGGCCCTACAAGAGGCAGCAGA
BORA	A_23_P25626	CTTTTGAAAGTCCTAGTGATTATTC	GACCATCTAAATTTCCCTGG	TCCATGAACAAACTCTCGCCAGT
Supplementary Table S1
